# Supplementary material for: Positive geotactic behaviors induced by geomagnetic field in Drosophila
Source: Springer Nature journal article supplement (doi:10.1186/s13041-016-0235-1), 2016-05-18

# S1 Fig.

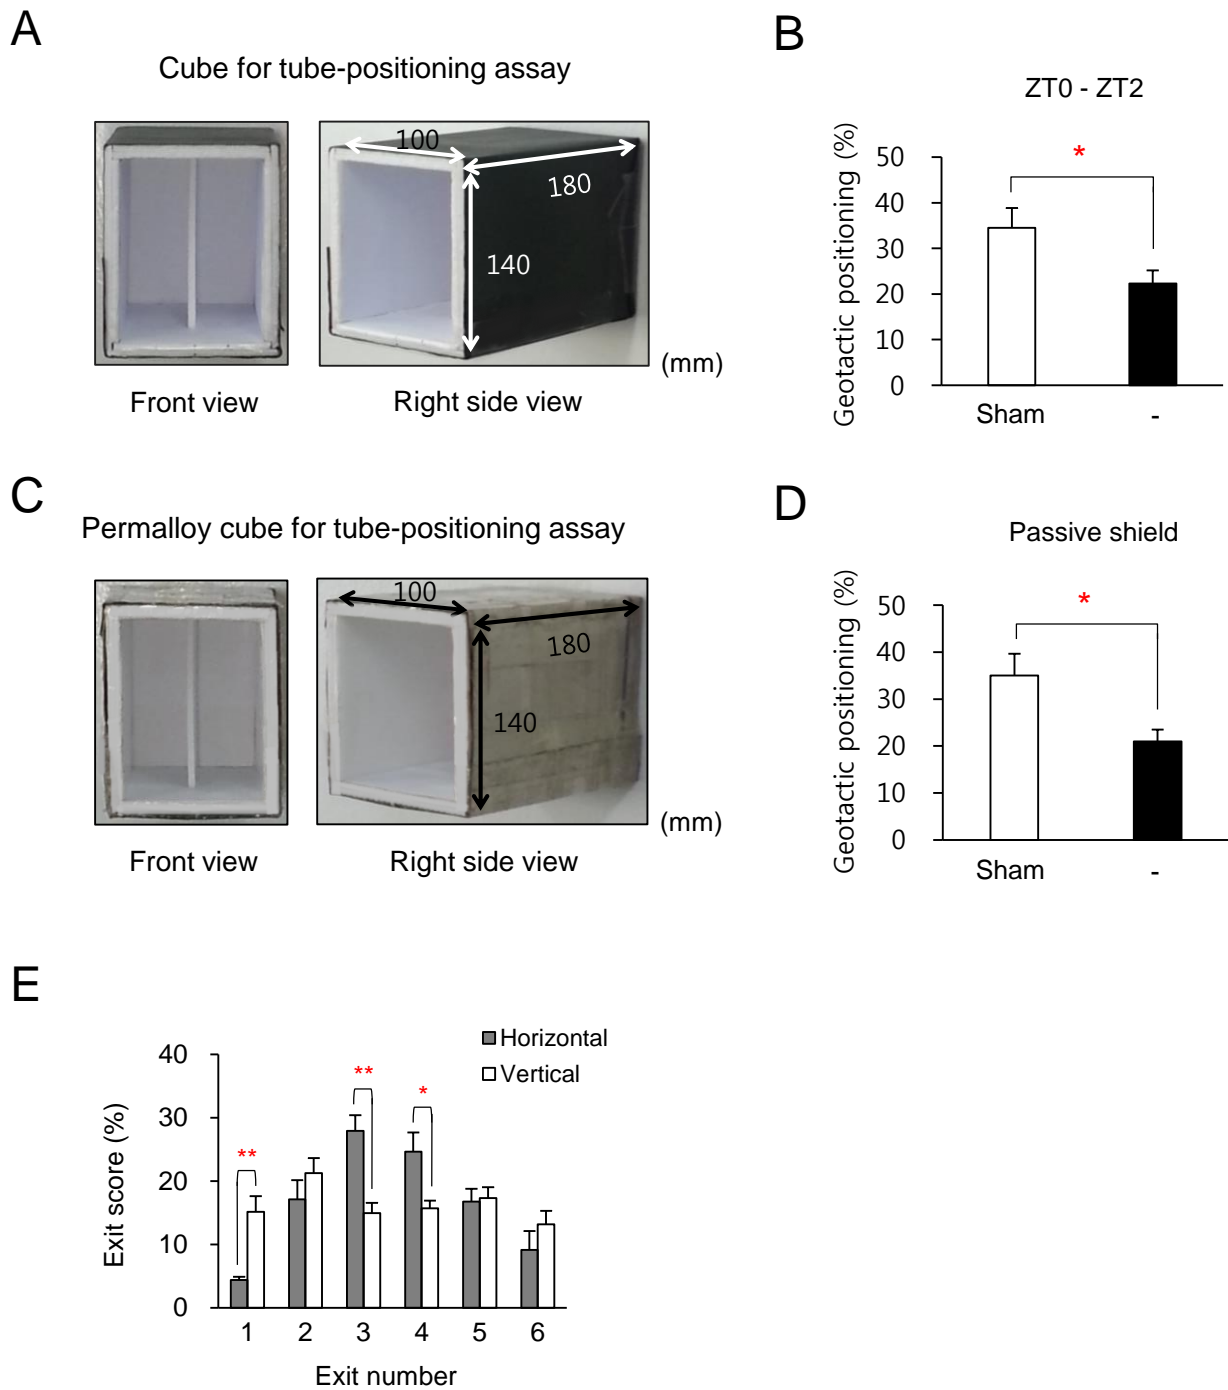

Supplement: MOESM2 [file 25663238]
