# Supplementary material for: Positive geotactic behaviors induced by geomagnetic field in Drosophila
Source: Springer Nature journal article supplement (doi:10.1186/s13041-016-0235-1), 2016-05-18

# S2 Fig.

## A

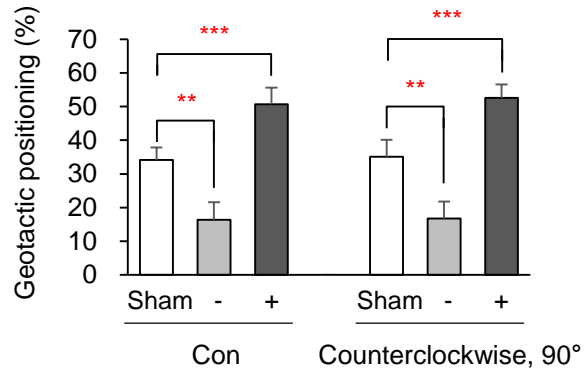

## B

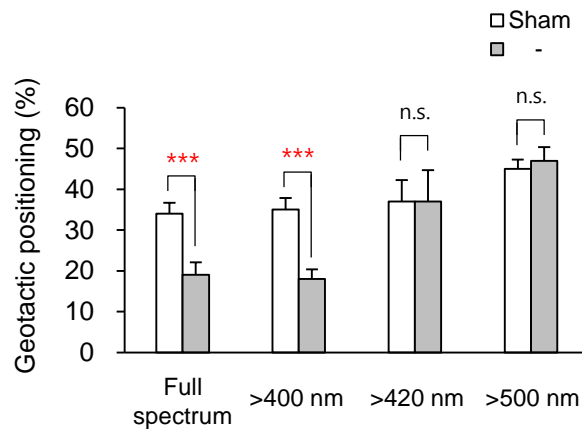

Supplement: MOESM6 [file 25663238]
