# Supplementary material for: Positive geotactic behaviors induced by geomagnetic field in Drosophila
Source: Springer Nature journal article supplement (doi:10.1186/s13041-016-0235-1), 2016-05-18

# S5 Fig.

## A

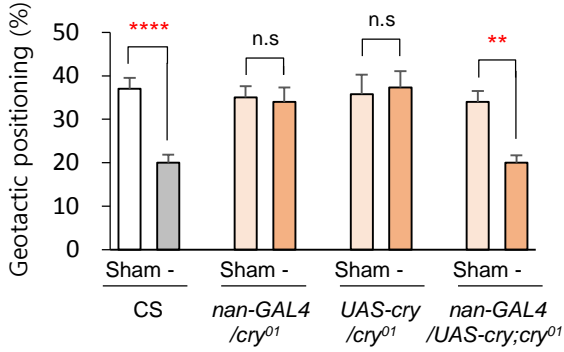

## B

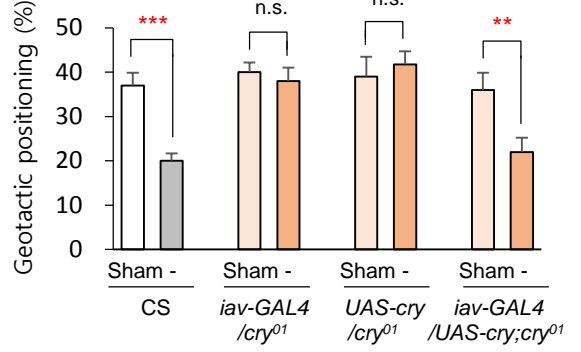

## C

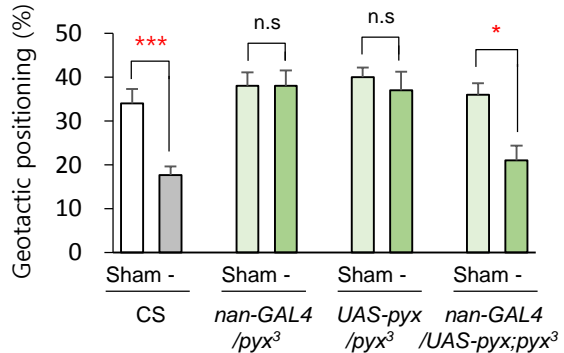

## D

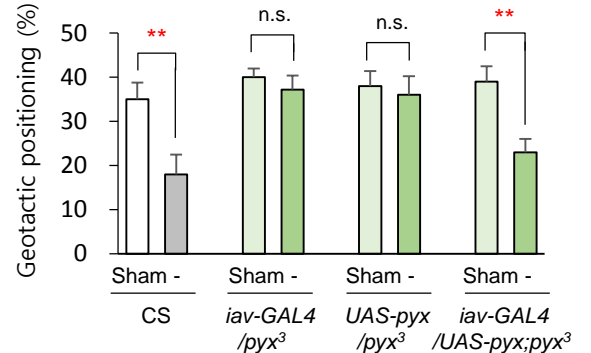

## E

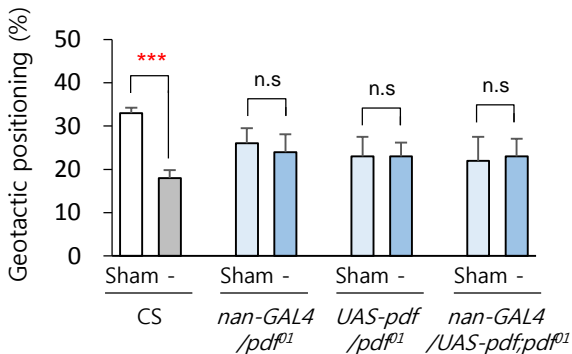

## F

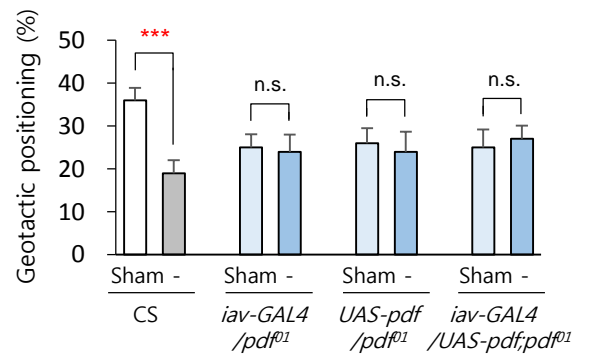

## G

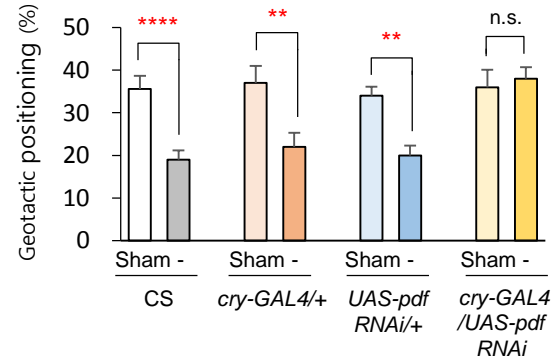

## H

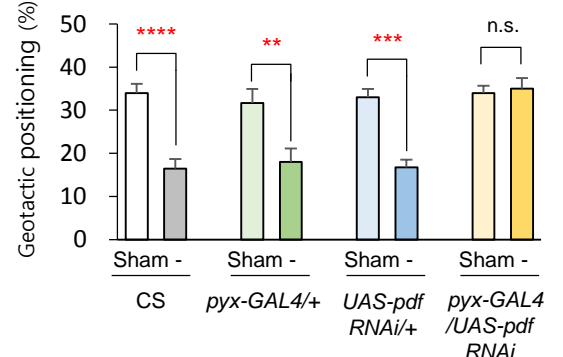

Supplement: MOESM9 [file 25663238]
